# Supplementary material for: Long-term comparison between index selection and optimal independent culling in plant breeding programs with genomic prediction
Source: PubMed Central journal article supplement (PMC8109766; doi:10.1371/journal.pone.0235554), 2021-05-10

# PLOS ONE

## An economic selection index should be used instead of independent culling in plant breeding programs with genomic selection

--Manuscript Draft--

|                                                                                                                                                                                                                                                                                                                   |                                                                                                                                                                                                                                                                                                                                                                                                                                                                                                                                                                                                                                                                                                                                                                                                                                                                                                                                                                                                                                                                                                                                                                                                                                                                                                                                                                                                                                                                                                                               |
|-------------------------------------------------------------------------------------------------------------------------------------------------------------------------------------------------------------------------------------------------------------------------------------------------------------------|-------------------------------------------------------------------------------------------------------------------------------------------------------------------------------------------------------------------------------------------------------------------------------------------------------------------------------------------------------------------------------------------------------------------------------------------------------------------------------------------------------------------------------------------------------------------------------------------------------------------------------------------------------------------------------------------------------------------------------------------------------------------------------------------------------------------------------------------------------------------------------------------------------------------------------------------------------------------------------------------------------------------------------------------------------------------------------------------------------------------------------------------------------------------------------------------------------------------------------------------------------------------------------------------------------------------------------------------------------------------------------------------------------------------------------------------------------------------------------------------------------------------------------|
| <b>Manuscript Number:</b>                                                                                                                                                                                                                                                                                         | PONE-D-20-04603                                                                                                                                                                                                                                                                                                                                                                                                                                                                                                                                                                                                                                                                                                                                                                                                                                                                                                                                                                                                                                                                                                                                                                                                                                                                                                                                                                                                                                                                                                               |
| <b>Article Type:</b>                                                                                                                                                                                                                                                                                              | Research Article                                                                                                                                                                                                                                                                                                                                                                                                                                                                                                                                                                                                                                                                                                                                                                                                                                                                                                                                                                                                                                                                                                                                                                                                                                                                                                                                                                                                                                                                                                              |
| <b>Full Title:</b>                                                                                                                                                                                                                                                                                                | An economic selection index should be used instead of independent culling in plant breeding programs with genomic selection                                                                                                                                                                                                                                                                                                                                                                                                                                                                                                                                                                                                                                                                                                                                                                                                                                                                                                                                                                                                                                                                                                                                                                                                                                                                                                                                                                                                   |
| <b>Short Title:</b>                                                                                                                                                                                                                                                                                               | Comparison of multi trait selection methods for breeding programs deploying genomic selection                                                                                                                                                                                                                                                                                                                                                                                                                                                                                                                                                                                                                                                                                                                                                                                                                                                                                                                                                                                                                                                                                                                                                                                                                                                                                                                                                                                                                                 |
| <b>Corresponding Author:</b>                                                                                                                                                                                                                                                                                      | Lorena G Batista<br>University of Edinburgh<br>Edinburgh, Edinburgh UNITED KINGDOM                                                                                                                                                                                                                                                                                                                                                                                                                                                                                                                                                                                                                                                                                                                                                                                                                                                                                                                                                                                                                                                                                                                                                                                                                                                                                                                                                                                                                                            |
| <b>Keywords:</b>                                                                                                                                                                                                                                                                                                  |                                                                                                                                                                                                                                                                                                                                                                                                                                                                                                                                                                                                                                                                                                                                                                                                                                                                                                                                                                                                                                                                                                                                                                                                                                                                                                                                                                                                                                                                                                                               |
| <b>Abstract:</b>                                                                                                                                                                                                                                                                                                  | In the context of genomic selection, we evaluated and compared recurrent selection breeding programs using either index selection or independent culling for selection of parents. We simulated a clonally propagated crop breeding program for 20 cycles of selection using either independent culling or an economic selection index with two unfavourably correlated traits under selection. Cycle time from crossing to selection of parents was kept the same for both strategies. Our results demonstrate that accurate knowledge of the economic importance of traits is essential even when performing independent culling. This is because independent culling achieved its optimum genetic gain when the culling threshold for each trait varied accordingly to the economic importance of the traits. When gains from independent culling were maximised, the efficiency of converting genetic diversity into genetic gain of both selection methods were equivalent. When the same proportion selected of 10% for each trait was used instead of optimal culling levels, index selection was 10%, 128% and 310% more efficient than independent culling when the second trait had a relative economic importance of 1.0, 2.5 and 5.0, respectively. Given the complexity of estimating optimal culling levels and the fact that the gains achieved with independent culling are, at most, equivalent to index selection, the use of an economic selection index is recommended for multi-trait genomic selection. |
| <b>Order of Authors:</b>                                                                                                                                                                                                                                                                                          | Lorena G Batista<br>Robert Chris Gaynor<br>Gabriel R.A. Margarido<br>Tim Byrne<br>Peter Amer<br>Gregor Gorjanc<br>John M Hickey                                                                                                                                                                                                                                                                                                                                                                                                                                                                                                                                                                                                                                                                                                                                                                                                                                                                                                                                                                                                                                                                                                                                                                                                                                                                                                                                                                                               |
| <b>Additional Information:</b>                                                                                                                                                                                                                                                                                    |                                                                                                                                                                                                                                                                                                                                                                                                                                                                                                                                                                                                                                                                                                                                                                                                                                                                                                                                                                                                                                                                                                                                                                                                                                                                                                                                                                                                                                                                                                                               |
| <b>Question</b>                                                                                                                                                                                                                                                                                                   | <b>Response</b>                                                                                                                                                                                                                                                                                                                                                                                                                                                                                                                                                                                                                                                                                                                                                                                                                                                                                                                                                                                                                                                                                                                                                                                                                                                                                                                                                                                                                                                                                                               |
| <b>Financial Disclosure</b><br><br>Enter a financial disclosure statement that describes the sources of funding for the work included in this submission. Review the <a href="#">submission guidelines</a> for detailed requirements. View published research articles from <a href="#">PLOS ONE</a> for specific | LGB was supported by the Coordenação de Aperfeiçoamento de Pessoal de Nível Superior (CAPES, Computational Biology Programme, Grant No. BEX 0043/17-6). JMH, RCG and GG acknowledge the financial support from BBSRC and KWS UK, RAGT Seeds Ltd., Elsoms Wheat Ltd and Limagrain UK for the project "GplusE: Genomic selection and Environment modelling for next generation wheat breeding" (grants BB/L022141/1 and BB/L020467/1).                                                                                                                                                                                                                                                                                                                                                                                                                                                                                                                                                                                                                                                                                                                                                                                                                                                                                                                                                                                                                                                                                          |

examples.

This statement is required for submission and **will appear in the published article** if the submission is accepted. Please make sure it is accurate.

#### Unfunded studies

Enter: *The author(s) received no specific funding for this work.*

#### Funded studies

Enter a statement with the following details:

- Initials of the authors who received each award
- Grant numbers awarded to each author
- The full name of each funder
- URL of each funder website
- Did the sponsors or funders play any role in the study design, data collection and analysis, decision to publish, or preparation of the manuscript?
- **NO** - Include this sentence at the end of your statement: *The funders had no role in study design, data collection and analysis, decision to publish, or preparation of the manuscript.*
- **YES** - Specify the role(s) played.

\* typeset

#### Competing Interests

Use the instructions below to enter a competing interest statement for this submission. On behalf of all authors, disclose any [competing interests](#) that could be perceived to bias this work—acknowledging all financial support and any other relevant financial or non-financial competing interests.

This statement **will appear in the published article** if the submission is accepted. Please make sure it is accurate. View published research articles from [PLOS ONE](#) for specific examples.

The authors have declared that no competing interests exist.

**NO authors have competing interests**

Enter: *The authors have declared that no competing interests exist.*

**Authors with competing interests**

Enter competing interest details beginning with this statement:

*I have read the journal's policy and the authors of this manuscript have the following competing interests: [insert competing interests here]*

\* typeset

**Ethics Statement**

N/A

Enter an ethics statement for this submission. This statement is required if the study involved:

- Human participants
- Human specimens or tissue
- Vertebrate animals or cephalopods
- Vertebrate embryos or tissues
- Field research

Write "N/A" if the submission does not require an ethics statement.

General guidance is provided below. Consult the [submission guidelines](#) for detailed instructions. **Make sure that all information entered here is included in the Methods section of the manuscript.**

**Format for specific study types**

**Human Subject Research (involving human participants and/or tissue)**

- Give the name of the institutional review board or ethics committee that approved the study
- Include the approval number and/or a statement indicating approval of this research
- Indicate the form of consent obtained (written/oral) or the reason that consent was not obtained (e.g. the data were analyzed anonymously)

**Animal Research (involving vertebrate animals, embryos or tissues)**

- Provide the name of the Institutional Animal Care and Use Committee (IACUC) or other relevant ethics board that reviewed the study protocol, and indicate whether they approved this research or granted a formal waiver of ethical approval
- Include an approval number if one was obtained
- If the study involved *non-human primates*, add *additional details* about animal welfare and steps taken to ameliorate suffering
- If anesthesia, euthanasia, or any kind of animal sacrifice is part of the study, include briefly which substances and/or methods were applied

**Field Research**

Include the following details if this study involves the collection of plant, animal, or other materials from a natural setting:

- Field permit number
- Name of the institution or relevant body that granted permission

**Data Availability**

Authors are required to make all data underlying the findings described fully available, without restriction, and from the time of publication. PLOS allows rare exceptions to address legal and ethical concerns. See the [PLOS Data Policy](#) and [FAQ](#) for detailed information.

Yes - all data are fully available without restriction

A Data Availability Statement describing where the data can be found is required at submission. Your answers to this question constitute the Data Availability Statement and **will be published in the article**, if accepted.

**Important:** Stating 'data available on request from the author' is not sufficient. If your data are only available upon request, select 'No' for the first question and explain your exceptional situation in the text box.

Do the authors confirm that all data underlying the findings described in their manuscript are fully available without restriction?

**Describe where the data may be found in full sentences. If you are copying our sample text, replace any instances of XXX with the appropriate details.**

- If the data are **held or will be held in a public repository**, include URLs, accession numbers or DOIs. If this information will only be available after acceptance, indicate this by ticking the box below. For example: *All XXX files are available from the XXX database (accession number(s) XXX, XXX).*
- If the data are all contained **within the manuscript and/or Supporting Information files**, enter the following:  
*All relevant data are within the manuscript and its Supporting Information files.*
- If neither of these applies but you are able to provide **details of access elsewhere**, with or without limitations, please do so. For example:

*Data cannot be shared publicly because of [XXX]. Data are available from the XXX Institutional Data Access / Ethics Committee (contact via XXX) for researchers who meet the criteria for access to confidential data.*

*The data underlying the results presented in the study are available from (include the name of the third party*

All relevant data are within the manuscript and its Supporting Information files.

*and contact information or URL).*

- This text is appropriate if the data are owned by a third party and authors do not have permission to share the data.

\* typeset

Additional data availability information:

1 **An economic selection index should be used instead of independent culling in plant**  
2 **breeding programs with genomic selection**

3

4 **Lorena G. Batista\***, R. Chris Gaynor, Gabriel R. A. Margarido, Tim Byrne, Peter Amer,  
5 **Gregor Gorjanc, John M. Hickey**

6 Lorena G. Batista and Gabriel R.A. Margarido: “Luiz de Queiroz” College of Agriculture  
7 (University of São Paulo), Piracicaba, SP, 13418-900, Brazil. R. Chris Gaynor, Gregor Gorjanc  
8 and John Hickey: The Roslin Institute and Royal (Dick) School of Veterinary Studies, University  
9 of Edinburgh, Easter Bush Campus Research Centre, Midlothian EH25 9RG, UK. Tim Byrne:  
10 Abacusbio, Roslin Innovation Centre, University of Edinburgh, Easter Bush Campus Research  
11 Centre, Midlothian EH25 9RG, UK. Peter Amer: Abacusbio, Public Trust Building, Moray Place,  
12 Dunedin 9016, New Zealand

13 Received \_\_\_\_\_ . \* Corresponding author: loregbatista@gmail.com

14

15 **Abstract**

16 In the context of genomic selection, we evaluated and compared recurrent selection breeding  
17 programs using either index selection or independent culling for selection of parents. We simulated  
18 a clonally propagated crop breeding program for 20 cycles of selection using either independent  
19 culling or an economic selection index with two unfavourably correlated traits under selection.  
20 Cycle time from crossing to selection of parents was kept the same for both strategies. Our results  
21 demonstrate that accurate knowledge of the economic importance of traits is essential even when  
22 performing independent culling. This is because independent culling achieved its optimum genetic  
23 gain when the culling threshold for each trait varied accordingly to the economic importance of  
24 the traits. When gains from independent culling were maximised, the efficiency of converting  
25 genetic diversity into genetic gain of both selection methods were equivalent. When the same  
26 proportion selected of 10% for each trait was used instead of optimal culling levels, index selection  
27 was 10%, 128% and 310% more efficient than independent culling when the second trait had a  
28 relative economic importance of 1.0, 2.5 and 5.0, respectively. Given the complexity of estimating  
29 optimal culling levels and the fact that the gains achieved with independent culling are, at most,  
30 equivalent to index selection, the use of an economic selection index is recommended for multi-  
31 trait genomic selection.



## 32 **Introduction**

33           Crop breeding seeks to develop improved cultivars. Besides high yield levels, a successful  
34 cultivar in many crops must meet minimal standards for several other traits that are economically  
35 important, such as pest and disease resistance and product quality. Traits are often unfavourably  
36 correlated with each other (e.g., 1–5). When traits are antagonistically correlated, selection for one  
37 trait causes an undesired economic response in the other trait (6,7). This makes breeding to  
38 simultaneously improve multiple traits complicated.

39           Independent culling and the use of a selection index are two commonly used methods in  
40 plant breeding programs for selecting on multiple traits (7). Independent culling involves  
41 establishing minimum standards (i.e., culling levels) for each trait and only selecting individuals  
42 that meet these minimum standards. The thresholds can be set according to a specific selection  
43 intensity or a specific value, such as a value relative to an agronomic check. The application of  
44 independent culling can be on multiple traits simultaneously or on individual traits sequentially.  
45 The selection index method involves selection for all traits simultaneously based on a linear or  
46 non-linear combination of individual traits weighted by their importance for the breeding objective  
47 (8).

48           Theoretically, the selection index is the most effective method of selection for multiple  
49 traits (8–10). Independent culling is less effective than index selection because, when strictly  
50 applied, it will not select individuals below the threshold for only one trait despite being  
51 exceptional for all other traits, while the use of a selection index makes it possible to retain those  
52 individuals (7). However, independent culling can achieve nearly equivalent effectiveness using  
53 optimised thresholds (11).

54           When cost is considered, independent culling can be more efficient than a selection index  
55 (11). This is because independent culling does not require phenotypes for all individuals and traits  
56 at one time, whereas strict application of a selection index requires phenotypes for all traits. This  
57 benefit is particularly valuable to plant breeders, because early stages of the breeding program  
58 often have a very large number of individuals. Phenotyping all individuals for all traits is likely to  
59 be logistically and financially infeasible. For example, some traits have a high measurement cost,  
60 such as bread quality in wheat, so that they cannot be measured on a large number of individuals.  
61 Further, some traits can only be measured on older plants, such as lifetime production in sugarcane,  
62 or on a plot or group basis. Delaying selection until these traits become available would be  
63 effectively equivalent to random selection, because the breeder would have to reduce the overall  
64 size of the early stage. Thus, practical constraints require at least some use of independent culling  
65 on traits that can be phenotyped simply/quickly and at a lower cost in breeding programs utilising  
66 phenotypic selection.

67           The use of genomic selection in plant breeding may render the cost efficiency benefit of  
68 independent culling obsolete if all early generation individuals are genotyped. This is because  
69 genomic selection allows for accurate prediction of all traits at once (12). While genotyping all  
70 early generation individuals is not standard in most current breeding programs, it may become so  
71 in the future. This is likely to be the case if breeding programs adopt a two-part strategy to breeding  
72 that explicitly splits breeding programs into a rapid cycling, genomic selection guided, population  
73 improvement part tasked with developing new germplasm and a product development part focused  
74 on developing new varieties. Simulations of these breeding programs suggest they can deliver  
75 considerably more genetic gain than more conventional breeding programs (13).

76           Several studies have already discussed the benefits of incorporating genomic selection

77 strategies into crop breeding programs (13–16). In addition, other studies have demonstrated that  
78 combining index selection and genomic prediction can increase genetic gain in breeding programs  
79 (17,18) and, in the long term, even higher genetic gains can be obtained when multi-trait  
80 optimization strategies that also control for the loss of genetic diversity are used (19). However,  
81 differences in how multi-trait selection methods can affect not only genetic gain but other  
82 population parameters such as genetic diversity and genetic correlations over several cycles of  
83 recurrent selection have not yet been thoroughly investigated. In order to provide a more detailed  
84 account of population dynamics in the genomic selection framework, we used simulations of  
85 recurrent breeding programs to evaluate and compare both index selection and the independent  
86 culling method for 20 cycles of selection. The purpose of these simulations was to quantify the  
87 magnitude of the difference between optimally set independent culling levels and an optimal  
88 selection index. The simulations also investigated the sensitivity of independent culling to sub-  
89 optimal culling levels.

## 90 **Material and Methods**

91 Stochastic simulations of entire breeding programs for multiple traits were used to compare  
92 the genetic gains in a breeding program using independent culling levels and a breeding program  
93 using an economic selection index for selection of parents. In the independent culling approach,  
94 selection was performed for one trait at a time at each stage of selection. A clonally propagated  
95 crop species was considered. Generally, in breeding programs for clonally propagated species,  
96 several crosses are performed between highly heterozygous hybrids, and all the genotypes in the  
97 resulting F<sub>1</sub> progenies are candidate clones to be released as cultivars or used as parents in the next  
98 breeding cycle (20). The methods were compared using the average of fifty replicates, each  
99 replicate consisting of: i) a burn-in phase shared by both strategies so that each strategy had an

100 identical, realistic starting point; and ii) an evaluation phase that simulated future breeding with  
101 different breeding strategies. The burn-in phase consisted of 20 years of breeding using  
102 independent culling for the selection of parents and the evaluation phase consisted of 20 cycles of  
103 selection using either independent culling or index selection.

#### 104 **Genome sequence**

105 For each replicate, a genome consisting of 10 chromosome pairs was simulated for the  
106 hypothetical clonally propagated plant species. These chromosomes were assigned a genetic length  
107 of 1.43 Morgans and a physical length of  $8 \times 10^8$  base pairs. Sequences for each chromosome were  
108 generated using the Markovian Coalescent Simulator (21) and AlphaSimR (22). Recombination  
109 rate was inferred from genome size (i.e.  $1.43 \text{ Morgans} / 8 \times 10^8 \text{ base pairs} = 1.8 \times 10^{-9}$  per base pair),  
110 and mutation rate was set to  $2 \times 10^{-9}$  per base pair. Effective population size was set to 50, with  
111 linear piecewise increases to 1,000 at 100 generations ago, 6,000 at 1,000 generations ago, 12,000  
112 at 10,000 generations ago, and 32,000 at 100,000 generations ago.

#### 113 **Founder genotypes**

114 Simulated genome sequences were used to produce 50 founder genotypes. These founder  
115 genotypes served as the initial parents in the burn-in phase. This was accomplished by randomly  
116 sampling gametes from the simulated genome to assign as sequences for the founders. Sites that  
117 were segregating in the founders' sequences were randomly selected to serve as 1,000 causal loci  
118 per chromosome (10,000 across the genome in total). To simulate genetic correlations between  
119 traits, the traits were treated as pleiotropic and the additive effects of the causal loci alleles were  
120 sampled from a multivariate normal distribution with mean  $\mu = \begin{bmatrix} 0 \\ 0 \end{bmatrix}$  and desired values of  
121 correlation.

## 122 **Estimated breeding values**

123           The true genetic value of the simulated traits was determined by the summing of its causal  
124 loci allele effects. The matrix **E** with the estimated breeding values of the traits for each individual  
125 in the population was obtained according to the formula:

$$126 \qquad \qquad \qquad \mathbf{E} = \mathbf{Y}\mathbf{P}^{-1}\mathbf{G}$$

127 Where **Y** is the matrix of phenotypes simulated by adding random error to the true genetic values  
128 of the traits, where rows correspond to individuals in the population and columns correspond to  
129 traits. The random error was sampled from a multivariate normal distribution with mean  $\mu = \begin{bmatrix} 0 \\ 0 \end{bmatrix}$   
130 and zero covariance, with variance values tuned to achieve a target level of accuracy ( $r$ ), which  
131 we define as the correlation between true and estimated breeding values. **P** is the phenotypic  
132 variance-covariance matrix of the traits, and **G** is the genetic variance-covariance matrix for the  
133 traits.

## 134 **Breeding methods**

135           The simulations modelled breeding for two component traits (T1 and T2) that were  
136 improved using either independent culling or an economic selection index. **With both strategies,**  
137 **an F<sub>1</sub> population of 5,000 individuals** was generated by randomly crossing the individuals in the  
138 crossing block (Parents). With independent culling, selection was carried out in two stages: a  
139 proportion of individuals was selected first based on T1 and then, from this proportion, the parents  
140 of the next breeding cycle were selected based on T2. With the selection index approach, the F<sub>1</sub>  
141 individuals with the highest values for the index trait were selected as parents of the next breeding  
142 cycle. The index trait was the sum of the estimated breeding values for each trait weighted by their  
143 economic importance. The number of selected parents (50 parents) and the cycle time from  
144 crossing to selection of new parents was kept the same for both strategies, so the comparisons

145 between them reflect only the differences due to the method of selection. The overall selection  
 146 scheme used for each method of selection is shown in Supplementary material 1 (Fig S1.1). For  
 147 simulation of breeding programs, we used the R package AlphaSimR (22).

148 **Simulated scenarios**

149 The selection index and independent culling methods were compared in a set of scenarios  
 150 that aimed to assess the relative performance of the methods under different levels of accuracy of  
 151 selection, and relative economic importance of T2. We were only interested in investigating the  
 152 relative performance of selection methods under challenging conditions for multi trait selection.  
 153 Hence, only an unfavourable genetic correlation between traits was simulated. A summary of all  
 154 simulated scenarios we used in this study is shown in Table 1.

155 Table 1. Summary of parameters simulated in all comparison scenarios of recurrent selection  
 156 breeding programs using either independent culling or selection index with two traits

| Scenario | Selected Proportion |         | Relative economic importance of Trait 2 | Accuracy |
|----------|---------------------|---------|-----------------------------------------|----------|
|          | Trait 1             | Trait 2 |                                         |          |
| 1        | Optimum             | Optimum | 1.0                                     | 0.3      |
| 2        | Optimum             | Optimum | 1.0                                     | 0.5      |
| 3        | Optimum             | Optimum | 1.0                                     | 0.99     |
| 4        | Optimum             | Optimum | 1.0                                     | 0.7      |
| 5        | Optimum             | Optimum | 2.5                                     | 0.7      |
| 6        | Optimum             | Optimum | 5.0                                     | 0.7      |
| 7        | 10%                 | 10%     | 1.0                                     | 0.7      |
| 8        | 10%                 | 10%     | 2.5                                     | 0.7      |
| 9        | 10%                 | 10%     | 5.0                                     | 0.7      |

157 For one set of scenarios we simulated four levels of accuracy (0.3, 0.5, 0.7, and 0.99),  
 158 assigned the same economic importance for both traits. In another set of scenarios, we varied the  
 159 relative economic importance of T2, but fixed selection accuracy to 0.7. Here, three levels of  
 160 relative economic importance were simulated. T1 was given an economic importance of 1.0 and  
 161 T2 an economic importance of either 1.0, 2.5 or 5.0. For each level of relative economic  
 162 importance, we simulated: i) scenarios where the proportion selected was the same (10%) when  
 163

164 selecting for both traits, and ii) scenarios where the proportions selected were set to achieve  
165 optimal culling levels (i.e., optimal independent culling). To achieve optimal culling levels, in each  
166 cycle of selection we chose the proportion selected for each trait that maximised the genetic gain.  
167 Thus, over the cycles of selection, when using optimal culling levels, instead of a fixed proportion  
168 selected of 10%, the proportion selected for each trait varied between cycles. To find the optimal  
169 proportions at each cycle, we fixed the number of parents selected (50 parents) and found the  
170 number of individuals to be selected in the first culling stage that maximized parents' economic  
171 value (i.e., index trait).

## 172 **Comparison**

173 The comparisons were made in terms of: i) genetic gain ii) genetic diversity, iii) the  
174 efficiency of converting genetic diversity into genetic gain for the index; and iv) genetic correlation  
175 between traits. For genetic gain and genetic diversity, we report values based on the individuals in  
176 the crossing block (parents) at each cycle of selection. We measured genetic gain as the increment  
177 in genetic mean (average of true genetic values) compared to the genetic mean in year 20. We  
178 measured genetic diversity with genetic standard deviation and genic standard deviation. We  
179 calculated genetic standard deviation as standard deviation of true genetic values. We calculated

180 genic standard deviation as  $\sigma_a = \sqrt{2 \sum_{i=1}^{n_q} p_i(1 - p_i)\alpha_i^2}$ , where  $n_q$  is the number of causal loci and  
181  $p_i$  and  $\alpha_i$  are, respectively, allele frequency and allele substitution effect at the  $i$ -th causal locus.

182 To measure efficiency, genetic mean and genic standard deviation were standardized to  
183 mean zero and unit standard deviation in year 20. We measured efficiency of converting genetic  
184 diversity into genetic gain by regressing the achieved genetic mean ( $y_t = (\mu_{a_t} - \mu_{a_{20}})/\sigma_{a_{20}}^2$ ) on  
185 lost genetic diversity ( $x_t = 1 - \sigma_{a_t}/\sigma_{a_{20}}$ ), i.e.,  $y_t = \alpha + bx_t + e_t$ , where  $b$  is efficiency (23).

186 We estimated efficiency with robust regression using function `rlm()` in R (24).

187 For genetic correlation, we report the correlation between the true genetic values of T1 and  
188 T2. We calculated this metric on the individuals in the F<sub>1</sub> population at each cycle of selection.

## 189 **Results**

190 Overall the results show that index selection provided consistent genetic gains and was  
191 equivalent to independent culling in terms of genetic gains and efficiency when optimal culling  
192 levels were used. Index selection performed better than independent culling in scenarios where  
193 independent culling levels were suboptimal.

194 We have structured the description of the results in two parts, corresponding to how the  
195 relative performance of the selection methods was affected by: i) the accuracy of selection, and ii)  
196 the relative economic importance of traits.

### 197 **Accuracy of selection**

198 The results show that increases in accuracy accentuated the differences in the genotypes  
199 being selected by either independent culling or index selection. This is shown in Fig. 1, where the  
200 genotypes selected as parents by each selection method are highlighted. Lower levels of accuracy  
201 led to a more diffuse cluster of selected genotypes and, with increasing selection accuracy, the  
202 cluster of selected genotypes approached what was expected for each method of selection (7).

203 **Fig 1. Scatterplots of true genetic values for Trait 1 (T1) and Trait 2 (T2) of the genotypes in**  
204 **the F1 population (grey) and genotypes selected as parents (orange) in the third cycle of**  
205 **selection using either independent culling (a) or a selection index (b) with different levels of**  
206 **accuracy**

207 Fig. 2 shows the change in the genetic correlation between the component traits for both  
208 independent culling and index selection over 20 cycles of selection at different levels of accuracy.  
209 Both selection methods resulted in the correlation between traits becoming increasingly  
210 unfavourable over the cycles of selection. For both methods, the change in the genetic correlation  
211 was higher with higher values of accuracy. Compared to independent culling, index selection led



212 to larger changes in the genetic correlation between the two traits. After 20 cycles of selection with  
213 accuracy of 0.3, independent culling led to a genetic correlation that was 9% more unfavourable  
214 compared to the genetic correlation in cycle 0, while index selection led to a genetic correlation  
215 that was 17% more unfavourable compared to the genetic correlation in cycle 0. After 20 cycles  
216 of selection with accuracy of 0.99, independent culling led to a genetic correlation that was 29%  
217 more unfavourable compared to the genetic correlation in cycle 0, while index selection led to a  
218 genetic correlation that was 64% more unfavourable compared to the genetic correlation in cycle  
219 0.

220 **Fig 2. Change in genetic correlation (mean and 95% confidence interval) between traits in**  
221 **the F1 population over 20 cycles of selection using either optimal independent culling (IC) or**  
222 **a selection index (SI) with different levels of accuracy, and Trait 2 relative economic**  
223 **importance of 1.0**

224 The change of genetic mean in parents for the component traits and the index trait over the  
225 cycles of selection using each method is shown in Fig. 3. For both methods, the genetic gains for  
226 the component traits and the index trait increased with higher values of accuracy. In general, the  
227 selection index method and independent culling with optimal culling levels led to equivalent  
228 genetic gains for the component traits and the index trait. Only in the scenario with 0.99 accuracy  
229 did index selection lead to a slightly higher genetic gain compared to that achieved with optimal  
230 independent culling. For the index trait, after 20 cycles of selection with accuracy of 0.99, index  
231 selection had a genetic gain 4% higher than the genetic gain achieved with independent culling.

232 **Fig 3. Change in genetic mean for Trait 1 (T1), Trait 2 (T2) and Index Trait (Index) over 20**  
233 **cycles of selection using either optimal independent culling (IC) or a selection index (SI) with**  
234 **different levels of accuracy, unfavourably correlated traits, and T2 relative economic**  
235 **importance of 1.0**

236 Table 2 shows the genetic standard deviation of parents in cycle 20 and the loss in genetic  
237 standard deviation in cycle 20 compared to the genetic standard deviation in cycle 0 for the  
238 component traits and the index trait. The change of genetic diversity in parents for the component

239 traits and the index trait over the cycles of selection using each method is shown in Supplementary  
240 material 1 (Fig S1.2). For the component traits, when using index selection, the genetic standard  
241 deviation showed an initial increase in the first few cycles of selection followed by a gradual  
242 decrease in the subsequent cycles. When using independent culling, the decrease in the genetic  
243 standard deviation of the component traits was continual over the cycles of selection. Both of these  
244 trends were more obvious with increasing values of accuracy. For all values of accuracy,  
245 independent culling led to a higher loss in the genetic standard deviation of the component traits  
246 compared to the index selection. For T1 and T2, independent culling with accuracy of 0.3 led to a  
247 loss of genetic standard deviation that was 6% and 5% higher than the loss of genetic standard  
248 deviation observed for index selection, respectively. With accuracy of 0.99, for T1 and T2  
249 independent culling led to a loss of genetic standard deviation that was 65% and 51% higher than  
250 the loss of genetic standard deviation observed for index selection, respectively. For the index trait,  
251 both methods led to equivalent values of genetic standard deviation. With accuracies of 0.3 and  
252 0.99, index selection led to a loss in the genetic standard deviation of the index trait that was 3%  
253 higher compared to the loss of genetic standard deviation observed using independent culling,  
254 respectively.

255 Table 2. Mean genetic standard deviation (Genetic SD) of parents in cycle 20 and loss in genetic  
 256 standard deviation in cycle 20 in comparison to the genetic standard deviation in cycle 0 (Loss  
 257 over cycle 0) for trait 1 (T1), trait 2 (T2) and the index trait using either optimal independent  
 258 culling or index selection with different levels of accuracy, unfavourably correlated traits, and T2  
 259 relative economic importance of 1.0

| <b>Independent culling</b> |                                  |                              |                                  |                              |                                  |                              |
|----------------------------|----------------------------------|------------------------------|----------------------------------|------------------------------|----------------------------------|------------------------------|
|                            | <b>T1</b>                        |                              | <b>T2</b>                        |                              | <b>Index trait</b>               |                              |
| <b>Accuracy</b>            | <b>Genetic SD<br/>(cycle 20)</b> | <b>Loss over<br/>cycle 0</b> | <b>Genetic SD<br/>(cycle 20)</b> | <b>Loss over<br/>cycle 0</b> | <b>Genetic SD<br/>(cycle 20)</b> | <b>Loss over<br/>cycle 0</b> |
| 0.3                        | 3.51 (0.08)*                     | -17%                         | 3.68 (0.08)                      | -16%                         | 3.57 (0.06)                      | -22%                         |
| 0.5                        | 2.56 (0.06)                      | -30%                         | 2.45 (0.04)                      | -28%                         | 2.69 (0.05)                      | -32%                         |
| 0.7                        | 1.65 (0.04)                      | -42%                         | 1.64 (0.03)                      | -37%                         | 1.88 (0.04)                      | -45%                         |
| 0.99                       | 0.45 (0.01)                      | -68%                         | 0.45 (0.01)                      | -55%                         | 0.74 (0.02)                      | -62%                         |

  

| <b>Index Selection</b> |                                  |                              |                                  |                              |                                  |                              |
|------------------------|----------------------------------|------------------------------|----------------------------------|------------------------------|----------------------------------|------------------------------|
|                        | <b>T1</b>                        |                              | <b>T2</b>                        |                              | <b>Index trait</b>               |                              |
| <b>Accuracy</b>        | <b>Genetic SD<br/>(cycle 20)</b> | <b>Loss over<br/>cycle 0</b> | <b>Genetic SD<br/>(cycle 20)</b> | <b>Loss over<br/>cycle 0</b> | <b>Genetic SD<br/>(cycle 20)</b> | <b>Loss over<br/>cycle 0</b> |
| 0.3                    | 3.80 (0.09)                      | -11%                         | 4.00 (0.09)                      | -11%                         | 3.66 (0.08)                      | -19%                         |
| 0.5                    | 3.19 (0.08)                      | -17%                         | 3.19 (0.07)                      | -14%                         | 2.57 (0.06)                      | -33%                         |
| 0.7                    | 2.69 (0.06)                      | -16%                         | 2.60 (0.06)                      | -18%                         | 1.86 (0.04)                      | -41%                         |
| 0.99                   | 1.93 (0.4)                       | -3%                          | 1.91 (0.04)                      | -4%                          | 0.51 (0.01)                      | -59%                         |

260 \* standard errors of the estimates are presented in parenthesis

261  
 262 Table 3 shows the genic standard deviation of parents in cycle 20 and the loss in genic  
 263 standard deviation in cycle 20 compared to the genic standard deviation in cycle 0 for the  
 264 component traits and the index trait. The values of genic standard deviation of T1, T2, and the  
 265 index trait were equivalent. The highest difference between methods in the loss in genic standard  
 266 deviation was 1% for all values of accuracy, except with accuracy of 0.99. With 0.99 accuracy, for  
 267 T1, T2 and the index trait, index selection led to a loss in the genic standard deviation that was 3%  
 268 higher compared to the loss of genic standard deviation observed using independent culling.

269

270 Table 3. Genic standard deviation (Genic SD) of parents in cycle 20 and loss in genic standard  
 271 deviation in cycle 20 in comparison to the genic standard deviation in cycle 0 (Loss over cycle 0)  
 272 for trait 1 (T1), trait 2 (T2) and the index trait using either optimal independent culling or index  
 273 selection with different levels of accuracy, unfavourably correlated traits, and T2 relative  
 274 economic importance of 1.0

| Accuracy | Independent culling |                   |                     |                   |                     |                   |
|----------|---------------------|-------------------|---------------------|-------------------|---------------------|-------------------|
|          | T1                  |                   | T2                  |                   | Index trait         |                   |
|          | Genic SD (cycle 20) | Loss over cycle 0 | Genic SD (cycle 20) | Loss over cycle 0 | Genic SD (cycle 20) | Loss over cycle 0 |
| 0.3      | 3.94 (0.06)*        | -15%              | 4.11 (0.07)         | -15%              | 4.04 (0.05)         | -16%              |
| 0.5      | 3.48 (0.06)         | -24%              | 3.41 (0.05)         | -24%              | 3.44 (0.04)         | -25%              |
| 0.7      | 2.94 (0.04)         | -34%              | 2.89 (0.04)         | -34%              | 2.89 (0.04)         | -34%              |
| 0.99     | 2.35 (0.04)         | -42%              | 2.35 (0.04)         | -42%              | 2.33 (0.04)         | -43%              |

  

| Accuracy | Index Selection     |                   |                     |                   |                     |                   |
|----------|---------------------|-------------------|---------------------|-------------------|---------------------|-------------------|
|          | T1                  |                   | T2                  |                   | Index trait         |                   |
|          | Genic SD (cycle 20) | Loss over cycle 0 | Genic SD (cycle 20) | Loss over cycle 0 | Genic SD (cycle 20) | Loss over cycle 0 |
| 0.3      | 3.92 (0.06)         | -16%              | 4.08 (0.07)         | -16%              | 4.02 (0.05)         | -16%              |
| 0.5      | 3.44 (0.06)         | -25%              | 3.37 (0.05)         | -25%              | 3.39 (0.05)         | -26%              |
| 0.7      | 2.92 (0.05)         | -34%              | 2.88 (0.05)         | -34%              | 2.87 (0.04)         | -35%              |
| 0.99     | 2.21 (0.04)         | -45%              | 2.22 (0.04)         | -45%              | 2.17 (0.03)         | -46%              |

\* standard errors of the estimates are presented in parenthesis

275  
276

### 277 Relative economic importance of traits

278 Fig. 4 shows the efficiency of converting genetic diversity into genetic gain for the index  
 279 trait when the relative economic importance of T2 varies. Independent culling was compared to  
 280 index selection using either optimal culling levels or selection with the same proportion of plants  
 281 selected (10%) for each trait. Index selection had the highest efficiency and most gain for all levels  
 282 of economic importance. The efficiency and gain for optimal independent culling levels was nearly  
 283 equivalent to index selection. The efficiency and gain for selecting the same proportion of plants  
 284 for both traits was worse than index selection for all levels of relative economic importance. Index  
 285 selection was 10%, 128% and 310% more efficient than independent culling using the same  
 286 proportion of selected plants for relative economic importance of 1.0, 2.5 and 5.0, respectively.

287 **Fig 4. Change of genetic mean and genic standard deviation for the index trait across 20**  
 288 **cycles of selection using either independent culling (IC) or a selection index (SI) under three**  
 289 **levels of relative economic importance (REI) and using either the same proportion selected**  
 290 **(10%) for Trait 1 (T1) and Trait 2 (T2) or optimal culling levels for each level of relative**

291 economic importance of T2 (a); and proportion selected (mean and 95% confidence interval)  
292 for T1 used to achieve optimal culling levels over the 20 cycles of selection (b). Traits are  
293 unfavourably correlated (-0.5). Individual replicates are shown by thin lines and a mean  
294 regression with a time-trend arrow. Values of genetic mean and genic standard deviation  
295 shown are standardized to mean zero and unit standard deviation in cycle 0  
296

297 Fig. 4 also shows the proportion of plant selected for T1 under optimal independent culling  
298 over the different levels of economic importance for T2. The mean proportion selected for T1 only  
299 varied slightly over the cycles of selection. The means were 29%, 93%, and 99% for relative  
300 economic importance of 1.0, 2.5, and 5.0, respectively. The variation about those means was  
301 largest with relative economic importance of 1.0 and smallest with relative economic importance  
302 of 5.0.

303

#### 304 Discussion

305 This study evaluated and compared recurrent selection breeding programs that either use  
306 index selection or independent culling for the selection of parents by genomic selection. Overall  
307 the results show that using index selection is either better or equivalent to independent culling in  
308 this context. Index selection outperformed independent culling when sub-optimal culling levels  
309 were used. Our results demonstrate that accurately assessing the economic importance of the traits  
310 is essential regardless of the method of selection being used.

311 The main difference between index selection and independent culling is that, when using  
312 index selection, genotypes that are exceptional for one of the traits under selection are more likely  
313 to be selected even though their performance for other traits is average. This can be seen in Fig. 1,  
314 with the cluster of individuals selected as parents with the index method including individuals that  
315 are more contrasting for the two traits under selection compared to the individuals selected with  
316 independent culling. The main implications of this are in the way each method affects the  
317 correlation between traits and the genetic diversity over cycles of recurrent selection. We discuss

318 each of these aspects in the following two sections. In the third section, we discuss how the relative  
319 economic importance of the traits can affect the relative performance of the methods. Lastly, we  
320 discuss the implications of our results for modern plant breeding programs which deploy genomic  
321 selection.

322

### 323 **Methods of selection and genetic correlation between traits**

324 The results show that, after only a few cycles of selection, index selection generates  $F_1$   
325 populations with a more unfavourable genetic correlation between traits than the  $F_1$  populations  
326 generated by independent culling (Fig 2). An explanation for the faster decrease of the genetic  
327 correlation observed with index selection is that the index is a linear combination of component  
328 traits. As shown by Bulmer (25), selection on a linear combination leads to negative covariances  
329 between components (i.e., Bulmer effect). Consequently, the same principle applies to the  
330 component traits and index selection, with index selection leading to an unfavourable genetic  
331 correlation between the component traits (26,27).

332 In general, genetic gains in multi-trait selection, regardless of the method of selection, are  
333 expected to be higher when the correlation between traits is favourable and lower when this  
334 correlation is unfavourable (9). As index selection generated  $F_1$  populations with more  
335 unfavourable genetic correlation between traits than independent culling, the genetic gains for  
336 index selection were potentially lower than for independent culling. Nevertheless, despite index  
337 selection being carried out under increasingly unfavourable genetic correlations over the cycles,  
338 the genetic gains obtained for the index trait were equivalent to the gains obtained using  
339 independent culling (Fig. 3).

340 Unfavourable genetic correlations are the most challenging scenario for breeders. When

341 traits are unfavourably correlated, selection on one trait results in response in an undesired  
342 direction for the other trait. When these correlations are due to pleiotropy, they cannot be broken  
343 with repeated cycles of recombination. This case is likely pervasive in several crops, e.g., grain  
344 yield and protein content in cereal crops (28–30), quality and disease resistance in forage crops  
345 (31), and yield and disease resistance in barley (32). However, the extent of genetic correlation  
346 and pleiotropy in these examples is unknown because unfavourable genetic correlations between  
347 the traits could also be, at least partly, induced by selection, as demonstrated in this study.

### 348 **Methods of selection and genetic diversity over cycles of selection**

349         According to Bulmer (25), reduction in the genetic variance due to selection stems mostly  
350 from the build-up of negative linkage disequilibrium between causal loci when selection is  
351 performed. This can be seen by comparing genetic and genic variation (Table 2 and Table 3,  
352 respectively). Genic variation is a function of the allele frequencies and the allele substitution  
353 effect only, and thus is not affected by changes in linkage disequilibrium. The results in Table 3  
354 show that the loss of genic standard deviation of the component traits and index trait are not greatly  
355 affected by the method of selection. Also, the method of selection did not greatly affect the trait  
356 means, as shown in Fig. 3. This indicates that, in terms of allele frequencies, there was little  
357 difference in the parents selected by either independent culling or the selection index method in  
358 situations similar to our simulation. Therefore, the difference between the selection methods  
359 derives from how they induce and exploit linkage disequilibrium between the causal variants of  
360 the component traits. Specifically, as shown in Table 2, independent culling induced a greater  
361 degree of negative linkage disequilibrium between the causal variants of the component traits  
362 resulting in those traits having less genetic variation. A deviation from this result is expected with  
363 more intense selection schemes and more component traits selected in successive stages, which

364 would induce larger changes in allele frequencies due to drift. As a consequence, differences  
365 between index selection and independent culling would be accentuated. In a previous study (33),  
366 the authors simulated and compared wheat breeding programs using different selection strategies  
367 under high and low selection intensities. They observed index selection resulted in higher  
368 population coancestry over cycles of selection compared to independent culling, and the difference  
369 between methods increased in scenarios with high selection intensity. Their results indicate index  
370 selection leads to a higher loss of genic standard deviation.

371 Somewhat surprisingly, it is possible to make an argument for the superiority of  
372 independent culling relative to a selection index on the basis of the differences observed in linkage  
373 disequilibrium. This is because independent culling produced populations with nearly equivalent  
374 mean performance, but with more consistent performance between individuals, which is  
375 demonstrated by the lower variation observed for the component traits. This property could be  
376 beneficial from a management perspective if differences in the component traits require variations  
377 in management of individuals. Breeding for plant-architecture traits in outbreeding cultivars is a  
378 good example where this property might be valuable, as having more uniform plants in the field  
379 favours mechanical harvest. However, we believe this property is more of an academic curiosity  
380 than something that will have practical application.

381 For simplicity and ease of implementation, our simulations consider the same genetic  
382 architecture for both traits, with both traits being controlled by a high number (10,000) of causal  
383 loci with small additive effects. Under different circumstances, such as at least one of the traits  
384 being controlled by few causal loci with higher allele substitution effects, different results could  
385 be expected. The results for the two-locus model in (34) show that independent culling tends to  
386 eliminate genotypes that are homozygous for alleles with low effect for one of the traits. For one



387 pleiotropic causal locus, when both alleles are favourable for one trait and unfavourable for the  
388 other trait, both homozygous genotypes tend to be culled, and independent culling would select  
389 the heterozygous genotypes. If heterozygous genotypes were preferred, the fixation of alleles  
390 would be slower and, therefore, the loss in genic standard deviation would be lower. Our results  
391 indicate that, for highly polygenic traits, differences between methods of selection in the loss of  
392 genetic diversity are mostly due to changes in linkage disequilibrium as opposed to distinctive  
393 changes in allele frequencies. Therefore, in terms of conserving genetic diversity there was no  
394 obvious advantage for either method. Other strategies such as optimal-cross selection  
395 (23,33,35,36) or the multi-objective optimized approach (19) should be considered in order to  
396 optimize gains while also controlling the loss of genetic diversity over cycles of selection. 

### 397 **Economic importance of the traits**

398 In general, when using the same selection intensity for both traits, the greater the difference  
399 in the economic importance of the traits, the better index selection will perform compared to  
400 independent culling (Fig. 4). This happens because there is a combination of selection intensities  
401 for each trait that maximizes the genetic gain when performing independent culling (8). Finding  
402 these selection intensities when selecting for two traits in two stages of selection is complex (37–  
403 40), and becomes even more complex with increasing number of traits and stages of selection  
404 (11,41,42).

405 The results in Fig. 4 show that independent culling approaches its maximal gain when a  
406 higher selection intensity is used for the trait with higher economic importance and a lower  
407 selection intensity is used for the trait with lower economic importance. In fact, when one trait had  
408 5 times the economic importance of the other trait, the optimum was achieved when almost no  
409 selection was carried out for the less important trait. These results demonstrate that accurately

410 assessing the economic importance of the traits is essential even when independent culling is  
411 performed.

412         Regardless of the gains achieved with independent culling being maximised, when parents  
413 are selected based on an index, equivalent gains are achieved by simply summing the values of the  
414 traits weighted by their economic importance. Once the true economic weights of the traits are  
415 quantified, index selection is much simpler than independent culling when using these weights for  
416 optimizing the genetic gains in a plant breeding program.

#### 417 **Index selection in modern plant breeding programs that use genomic selection**

418         There is little to no evidence suggesting plant breeders use analytical techniques to  
419 determine optimal independent culling thresholds and/or constructing selection indices in most  
420 plant breeding programs. More likely, the majority of breeders rely on their intuition for setting  
421 thresholds and constructing indices. Their decisions are likely guided by the performance of  
422 agronomic checks and are prone to fluctuations between seasons and individual breeders. This  
423 model has clearly been successful, because plant breeding programs have continued to deliver  
424 genetic gain. However, it is likely sub-optimal, and a more analytical approach should be adopted  
425 in the future.

426         The value of a more analytical approach becomes greater as genomic selection is more  
427 widely used. The results presented in this paper show a selection index is superior to independent  
428 culling when using genomic selection. These results are further supported by earlier theoretical  
429 work (8,9,43) and recent implementation of index selection in modern breeding programs of wheat  
430 (18) and Miscanthus (17). This indicates a clear preference for implementing selection indices in  
431 plant breeding.

432           The focus of plant breeders should be determining the economic weights for a selection  
433 index. In this paper the economic model used to select weights was implicitly assumed to be known  
434 and linear. The reality is that true economic model may be unknown to breeders and it is likely  
435 non-linear. The presence of a non-linear model does not pose a problem, because linear economic  
436 weights can be derived for improving the economic value of germplasm (44). However, this still  
437 requires defining the economic model, which constitutes the main challenge for using selection  
438 indices successfully.

439           The best way of determining economic weights has been a topic of extensive research and  
440 scientific debate (45–51). Recently, multi trait strategies have been proposed that suggest selection  
441 weights should be learned directly from the breeding population under selection. The authors in  
442 (52) proposed an eigen selection index method that do not require economic weights to be  
443 previously known and, instead, estimates them using genomic information from the breeding  
444 population. On the strategy proposed in (19), breeding choices are carried based on optimization  
445 of trade-offs across multiple traits as well as possible losses of genetic diversity in the population.

446           Given all the available tools, it is our opinion that plant breeders would benefit greatly from  
447 an increased emphasis on understanding and quantifying the **economics** of their species and using  
448 more analytical approaches when selecting for multiple traits. This would greatly aid breeders in  
449 getting the most out of genomic selection.

## 450 **Conclusions**

451           We evaluated and compared recurrent selection breeding programs using either  
452 independent culling or index selection for parent selection. The results show that, despite selection  
453 being carried out under unfavourable genetic correlations when using the selection index instead  
454 of independent culling, equivalent or higher genetic gains were achieved with index selection in

455 all simulated scenarios. In terms of genetic diversity, the differences between methods in the  
456 studied system were driven mostly by differences in the generation of linkage disequilibrium  
457 between causal loci induced and not differences in allele frequencies. When linkage disequilibrium  
458 was not considered, both methods were equivalent in terms of loss of genetic diversity, and the  
459 differences between methods in terms of efficiency of converting genetic diversity into genetic  
460 gains mostly reflected the differences in the genetic gains obtained with each method. To obtain  
461 higher genetic gains, accurately assessing the economic importance of the traits is essential even  
462 when independent culling is performed, as optimal culling levels should be determined in order  
463 for maximum gain to be achieved. Given that optimal culling levels are complex to estimate, once  
464 the economic importance of each trait is known, maximum genetic gains are more easily achieved  
465 with index selection. Therefore, the best choice for plant breeding programs is to select parents  
466 using an economic selection index.

#### 467 **Acknowledgements**

468 This study was supported by the Coordenação de Aperfeiçoamento de Pessoal de Nível  
469 Superior (CAPES, Computational Biology Programme, Grant No. BEX 0043/17-6). The Roslin  
470 authors acknowledge the financial support from BBSRC and KWS UK, RAGT Seeds Ltd., Elsoms  
471 Wheat Ltd and Limagrain UK for the project “GplusE: Genomic selection and Environment  
472 modelling for next generation wheat breeding” (grants BB/L022141/1 and BB/L020467/1).

#### 473 **Conflict of interest**

474 On behalf of all authors, the corresponding author states that there is no conflict of interest.

475 **References**

- 476 1. Kwon SH, Torrie JH. Heritability of and interrelationships among traits of two soybean  
477 population. 1964.
- 478 2. Meredith WR, Bridge RR. Breakup of Linkage Blocks in Cotton, *Gossypium hirsutum* L.1.  
479 *Crop Science*. 1971;11:695–8.
- 480 3. Erskine W, Williams PC, Nakkoul H. Genetic and environmental variation in seed yield,  
481 seed size and cooking quality of lentil. *Field Crops Research*. 1985;12:153–61.
- 482 4. Kato T, Takeda K. Associations among Characters Related to Yield Sink Capacity in  
483 Space-Planted Rice. *Crop Science*. 1996;36:1135–9.
- 484 5. Triboi E, Martre P, Girousse C, Ravel C, Triboi-Blondel AM. Unravelling environmental  
485 and genetic relationships between grain yield and nitrogen concentration for wheat.  
486 *European Journal of Agronomy*. 2006;25(2):108–18.
- 487 6. Falconer DS, Mackay TF, Frankham R. *Introduction to Quantitative Genetics* (4th edn).  
488 *Trends in Genetics*. 1996;12(7):280.
- 489 7. Bernardo R. *Breeding for quantitative traits in plants*. 1st ed. Woodbury: Stemma Press;  
490 2010. 390 p.
- 491 8. Hazel LN, Lush JL. The Efficiency of Three Methods of Selection. *Journal of Heredity*.  
492 1942;33(11):393–9.
- 493 9. Young S. A further examination of the relative efficiency of three methods of selection for  
494 genetic gains under less-restricted conditions. *Genetical Research Cambridge*.  
495 1961;2(1961):106–21.
- 496 10. Pesek J, Baker RJ. Comparison of tandem and index selection in the modified pedigree  
497 method of breeding self-pollinated species. *Canadian Journal of Plant Science*. 1969  
498 Nov;49(6):773–81.
- 499 11. Xu S, Muir WM. Multistage Selection for Genetic Gain by Orthogonal Transformation.  
500 *Genetics*. 1991 Nov;129(3):963–74.
- 501 12. Meuwissen THE, Hayes BJ, Goddard ME. Prediction of total genetic value using genome-  
502 wide dense marker maps. *Genetics*. 2001;157(4):1819–29.
- 503 13. Gaynor RC, Gorjanc G, Bentley AR, Ober ES, Howell P, Jackson R, et al. A Two-Part  
504 Strategy for Using Genomic Selection to Develop Inbred Lines. *Crop Science*.  
505 2017;57:2372–86.
- 506 14. Bernardo R, Yu J (2007) Prospects for Genomewide Selection for Quantitative Traits in  
507 Maize. *Crop Science* 47:1082–1090. doi: 10.2135/cropsci2006.11.0690

- 508 15. Heffner EL, Sorrells ME, Jannink J-L (2009) Genomic Selection for Crop Improvement.  
509 Crop Science 49:1–12. doi: 10.2135/cropsci2008.08.0512
- 510 16. Hickey JM, Chiurugwi T, Mackay I, Powell W, Participants IGS in CBPW. Genomic  
511 prediction unifies animal and plant breeding programs to form platforms for biological  
512 discovery. Nature Genetics. 2017 Aug 30;49:1297.
- 513 17. Slavov GT, Davey CL, Bosch M, Robson PRH, Donnison IS, Mackay IJ. Genomic index  
514 selection provides a pragmatic framework for setting and refining multi-objective breeding  
515 targets in Miscanthus. Annals of Botany [Internet]. 2018 Oct 23 [cited 2019 Jun 9];  
516 Available from: [https://academic.oup.com/aob/advance-](https://academic.oup.com/aob/advance-article/doi/10.1093/aob/mcy187/5142550)  
517 [article/doi/10.1093/aob/mcy187/5142550](https://academic.oup.com/aob/advance-article/doi/10.1093/aob/mcy187/5142550)
- 518 18. Michel S, Löschenberger F, Ametz C, Pachler B, Sparry E, Bürstmayr H. Simultaneous  
519 selection for grain yield and protein content in genomics-assisted wheat breeding.  
520 Theoretical and Applied Genetics. 2019 Jun;132(6):1745–60.
- 521 19. Akdemir D, Beavis W, Fritsche-Neto R, Singh AK, Isidro-Sánchez J. Multi-objective  
522 optimized genomic breeding strategies for sustainable food improvement. Heredity. 2019  
523 May;122(5):672–83.
- 524 20. Grüneberg W, Mwangi R, Andrade M, Espinoza J. Selection methods. Part 5: Breeding  
525 clonally propagated crops. Plant Breeding and Farmer Participation. 2009;(April):275–322.
- 526 21. Chen GK, Marjoram P, Wall JD. Fast and flexible simulation of DNA sequence data.  
527 Genome research. 2009;19(1):136–142.
- 528 22. Gaynor RC, Gorjanc G, Wilson DL. AlphaSimR: An R Package for Breeding Program  
529 Simulations. Manuscr Prep.
- 530 23. Gorjanc G, Gaynor RC, Hickey JM. Optimal cross selection for long-term genetic gain in  
531 two- part programs with rapid recurrent genomic selection. bioRxiv. 2017;
- 532 24. Venables WN, Ripley BD. Modern Applied Statistics with S. Fourth Edi. New York:  
533 Springer; 2002.
- 534 25. Bulmer MG (1971) The effect of selection on genetic variability. 105:1–88
- 535 26. Tallis GM. Ancestral covariance and the Bulmer effect. Theoretical and Applied Genetics.  
536 1987;73(6):815–20.
- 537 27. Itoh Y. Changes in genetic correlations by index selection. Genetics selection evolution  
538 GSE. 1991;23(4):301–8.
- 539 28. Duvick DN, Cassman KG. Post–Green Revolution Trends in Yield Potential of Temperate  
540 Maize in the North-Central United States. Crop Science. 1999;39:1622–30.

- 541 29. Rharrabti Y, Elhani S, Martos-Núñez V, García del Moral LF. Protein and Lysine Content,  
542 Grain Yield, and Other Technological Traits in Durum Wheat under Mediterranean  
543 Conditions. *Journal of Agricultural and Food Chemistry*. 2001 Aug 1;49(8):3802–7.
- 544 30. Rotundo JL, Borrás L, Westgate ME, Orf JH. Relationship between assimilate supply per  
545 seed during seed filling and soybean seed composition. *Field Crops Research*.  
546 2009;112(1):90–6.
- 547 31. Casler MD, Vogel KP. Accomplishments and Impact from Breeding for Increased Forage  
548 Nutritional Value. *Crop Science*. 1999;39:12–20.
- 549 32. Smedegaard-Petersen V, Tolstrup K. The Limiting Effect of Disease Resistance on Yield.  
550 *Annual Review of Phytopathology*. 1985;23(1):475–90.
- 551 33. Cowling W, Li L. Turning the heat up on independent culling in crop breeding. 2018. 119–  
552 134 p.
- 553 34. Bennett G, Swiger L. Genetic variance and correlation after selection for two traits by  
554 index, independent culling levels and extreme selection. *Genetics*. 1980;94(3):763–75.
- 555 35. Clark SA, Kinghorn BP, Hickey JM, Van Der Werf JHJ. The effect of genomic information  
556 on optimal contribution selection in livestock breeding programs. *Genetics Selection  
557 Evolution*. 2013;45(1):1–8.
- 558 36. Woolliams JA, Berg P, Dagnachew BS, Meuwissen THE. Genetic contributions and their  
559 optimization. *Journal of Animal Breeding and Genetics*. 2015 Apr;132(2):89–99.
- 560 37. Young SSY, Weiler H. Selection for two correlated traits by independent culling levels.  
561 *Journal of Genetics*. 1960;57(2):329–38.
- 562 38. Namkoong G. Optimum Allocation of Selection Intensity in Two Stages of Truncation  
563 Selection. *Biometrics*. 1970 Sep;26(3):465.
- 564 39. Cotterill PP, James JW. Optimising two-stage independent culling selection in tree and  
565 animal breeding. *Theoretical and Applied Genetics* [Internet]. 1981 [cited 2018 Oct  
566 19];59(2). Available from: <http://link.springer.com/10.1007/BF00285891>
- 567 40. Smith SP, Quaas RL. Optimal Truncation Points for Independent Culling-Level Selection  
568 Involving Two Traits. *Biometrics*. 1982 Dec;38(4):975.
- 569 41. Saxton AM. INDCULL Version 3.0: Independent Culling for Two or More Traits. *Journal  
570 of Heredity*. 1989 Mar 1;80(2):166–7.
- 571 42. Ducrocq V, Colleau JJ. Optimum truncation points for independent culling level selection  
572 on a multivariate normal distribution, with an application to dairy cattle selection. *Genetics  
573 Selection Evolution*. 1989 Jun 15;21(2):185.

- 574 43. Smith HF. A Discriminant Function for Plant Selection. *Annals of Eugenics*. 1936 Nov  
575 1;7(3):240–50.
- 576 44. Goddard ME. Selection indices for non-linear profit functions. *Theoret Appl Genetics*. 1983  
577 Mar 1;64(4):339–44.
- 578 45. Moav R. Economic evaluation of genetic differences. In: *Agricultural genetics: selected*  
579 *topics*. New York: Wiley; 1973. p. 319–52.
- 580 46. Brascamp EW, Smith C, Guy DR. Derivation of economic weights from profit equations.  
581 *Animal Production*. 1985;40:175–80.
- 582 47. Smith C, James JW, Brascamp EW. On the derivation of economic weights in livestock  
583 improvement. *Animal Science*. 1986;43(3):545–51.
- 584 48. Johnson BE, Dauer JP, Gardner CO. A model for determining weights of traits in  
585 simultaneous multitrait selection. *Applied Mathematical Modelling*. 1988 Dec;12(6):556–  
586 64.
- 587 49. Amer PR, Fox GC. Estimation of economic weights in genetic improvement using  
588 neoclassical production theory: an alternative to rescaling. *Animal Science*. 1992  
589 Jun;54(3):341–50.
- 590 50. Liu Y-H, Dauer JP. A bicriteria linear programming model for determining linear utility  
591 functions in simultaneous multiple trait selection and classification. *Applied Mathematical*  
592 *Modelling*. 1996 Aug;20(8):572–8.
- 593 51. Aubry CA, Adams WT, Fahey TD. Determination of relative economic weights for  
594 multitrait selection in coastal Douglas-fir. 1998;28:7.
- 595 52. Ceron Rojas JJ, Crossa J. *Linear selection indices in modern plant breeding*. Springer; 2018.



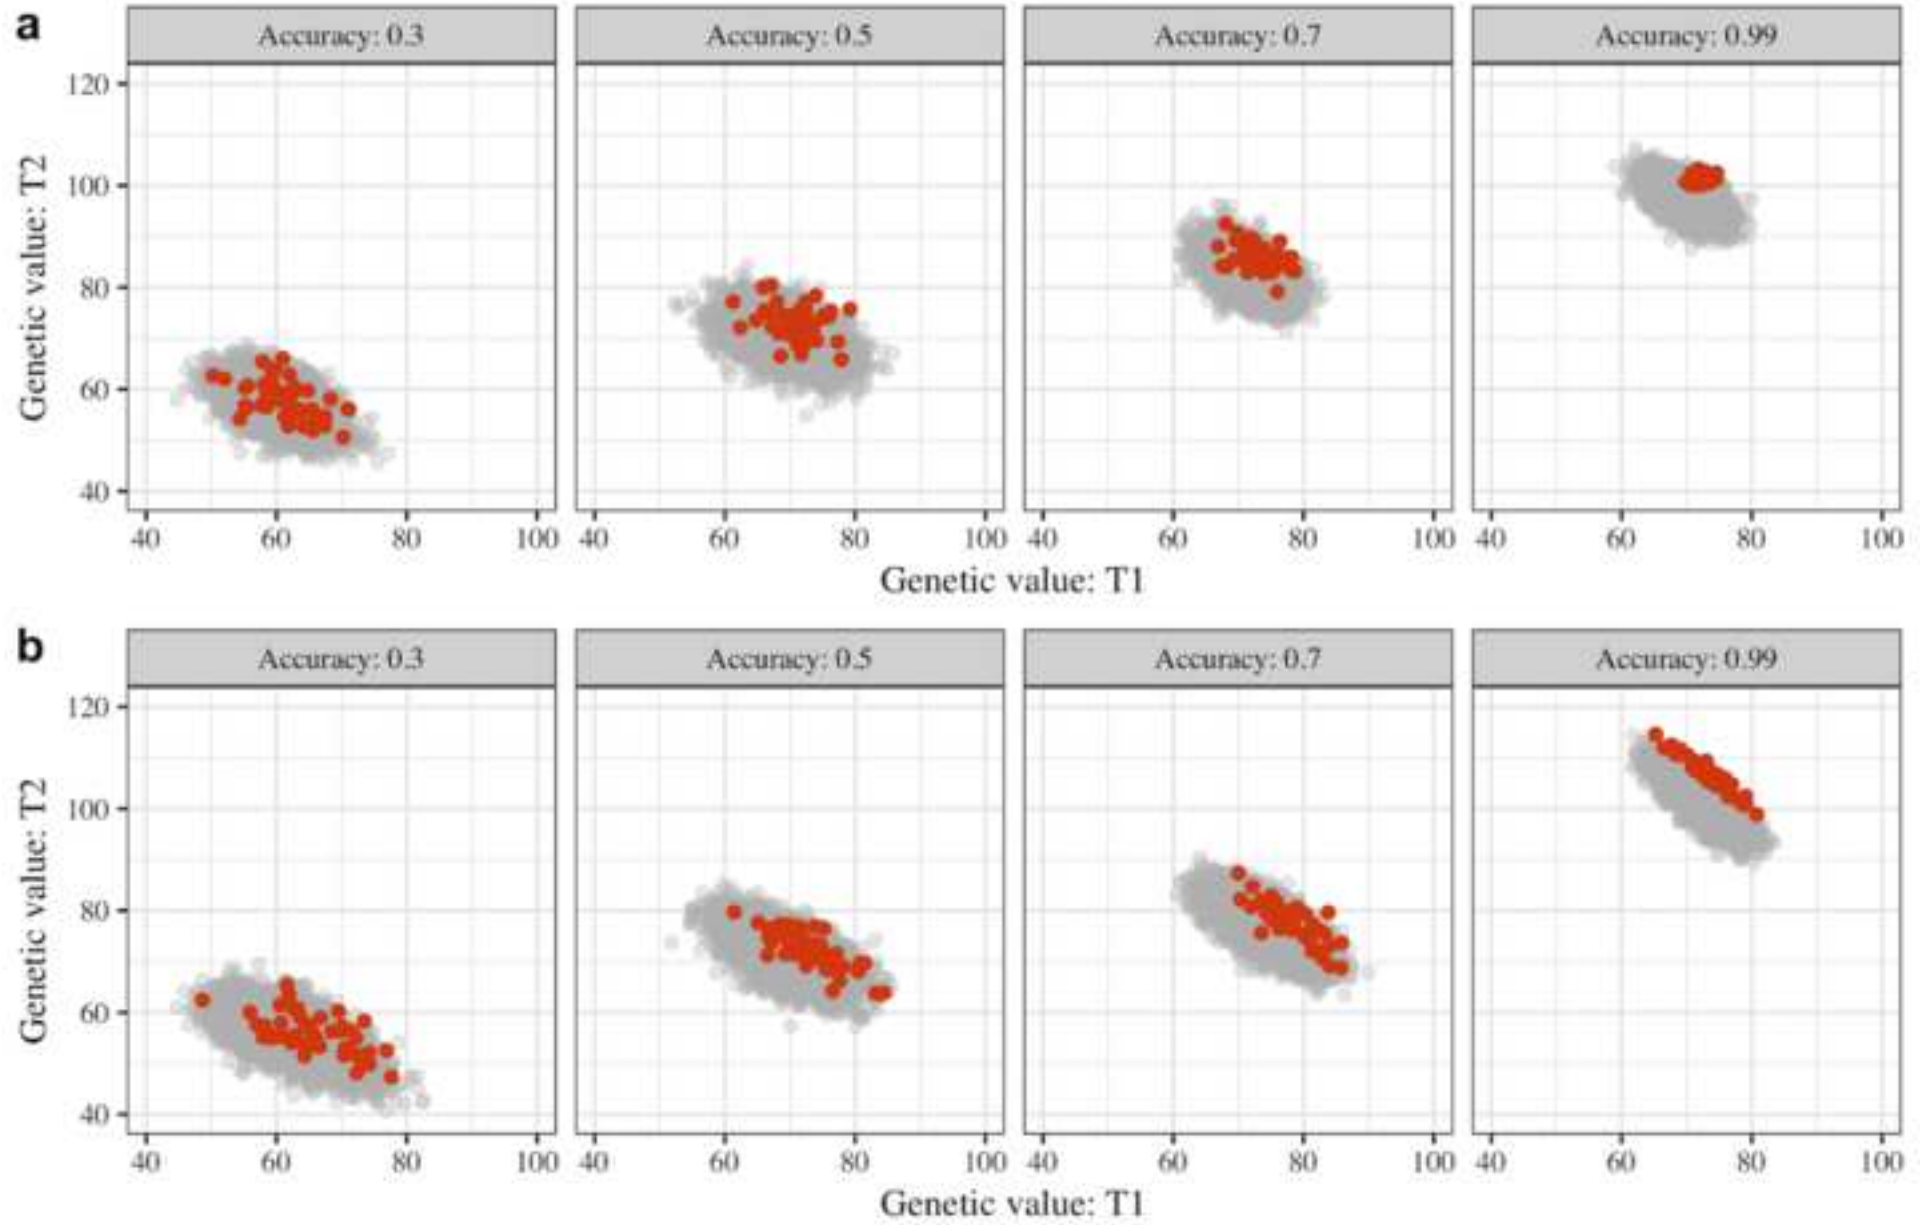

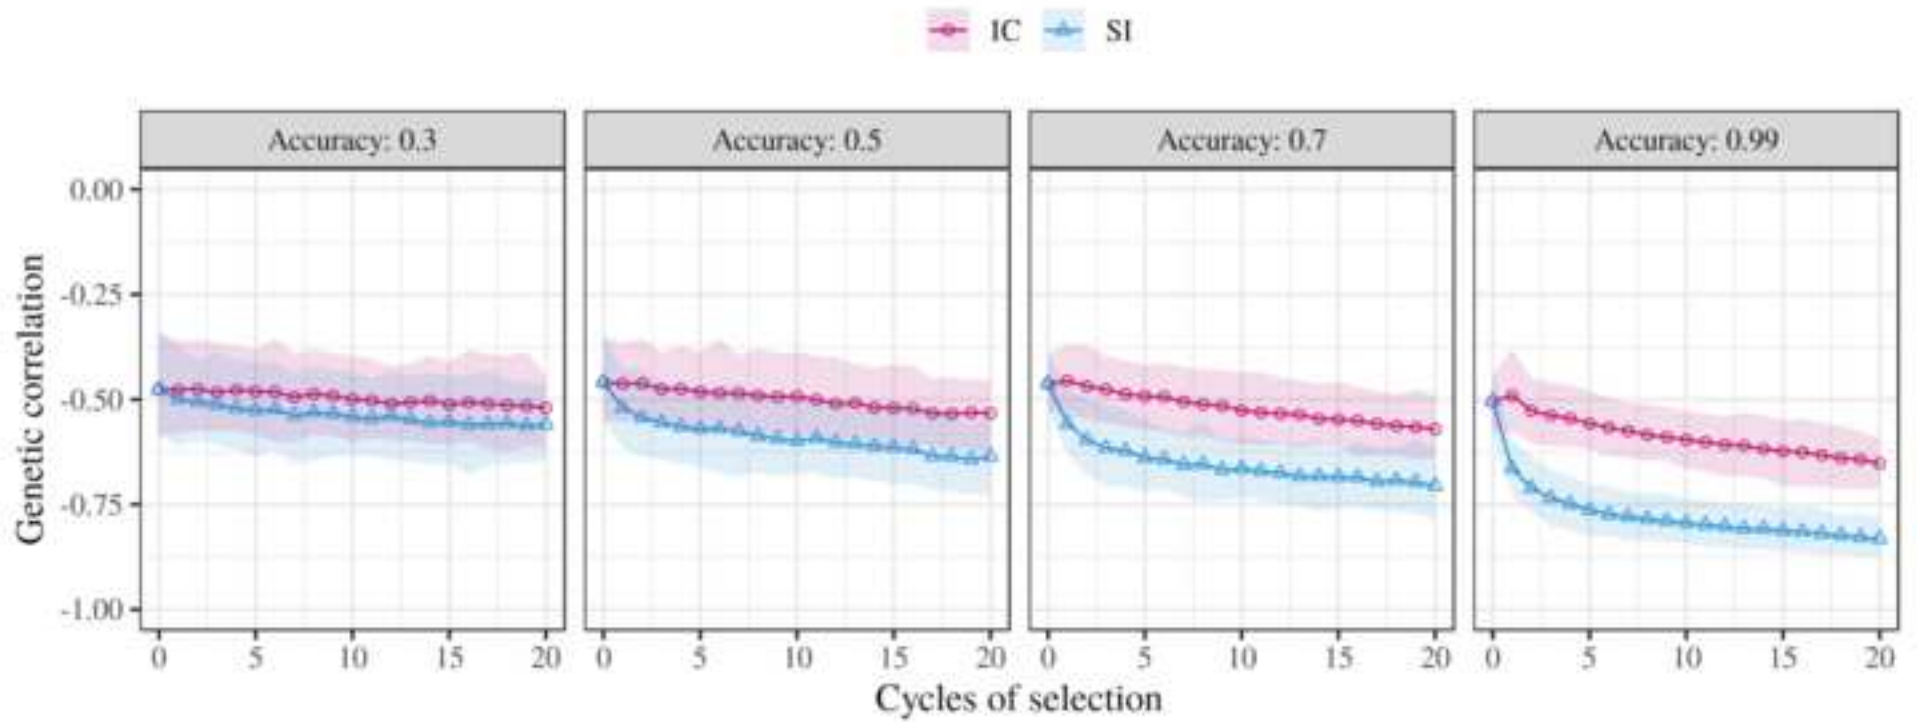

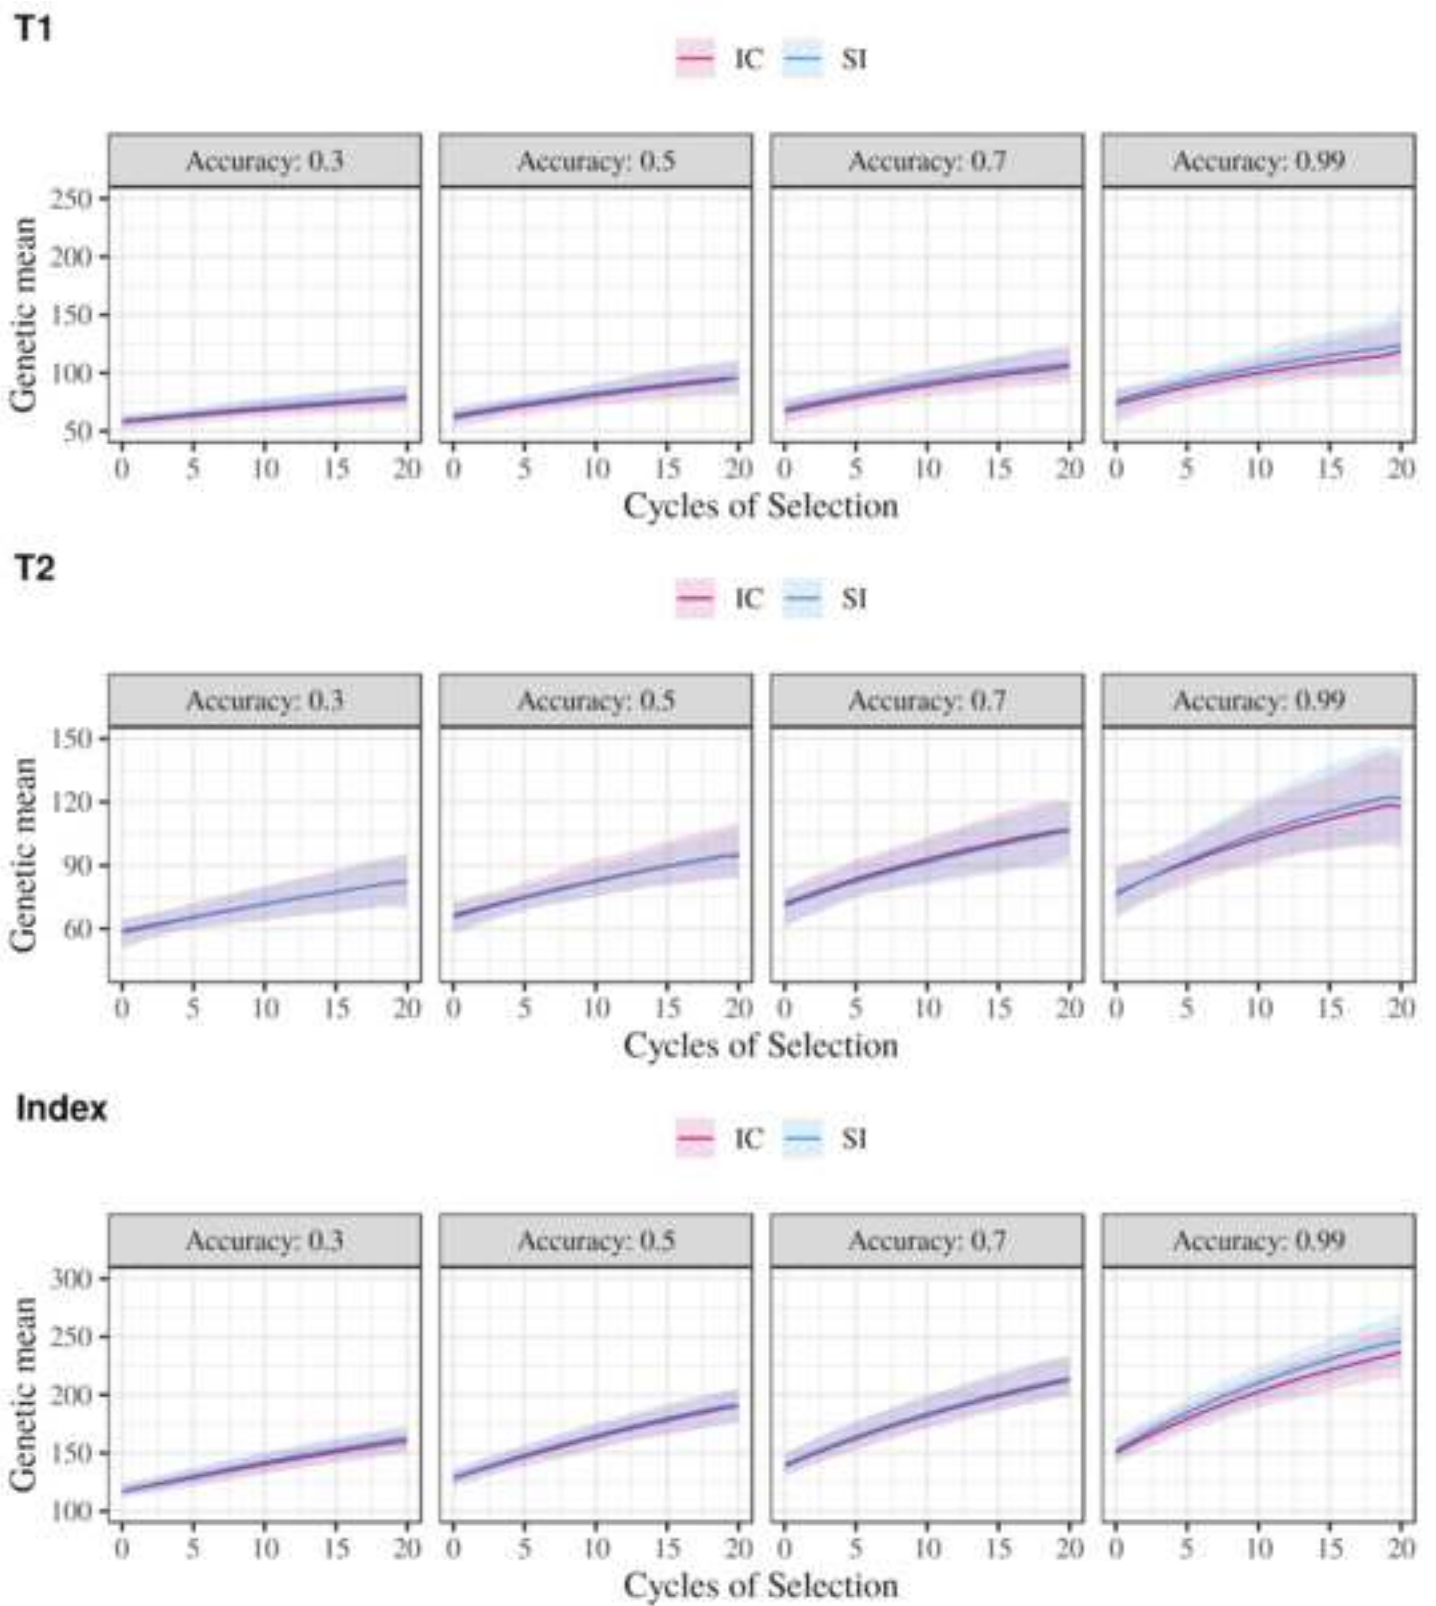

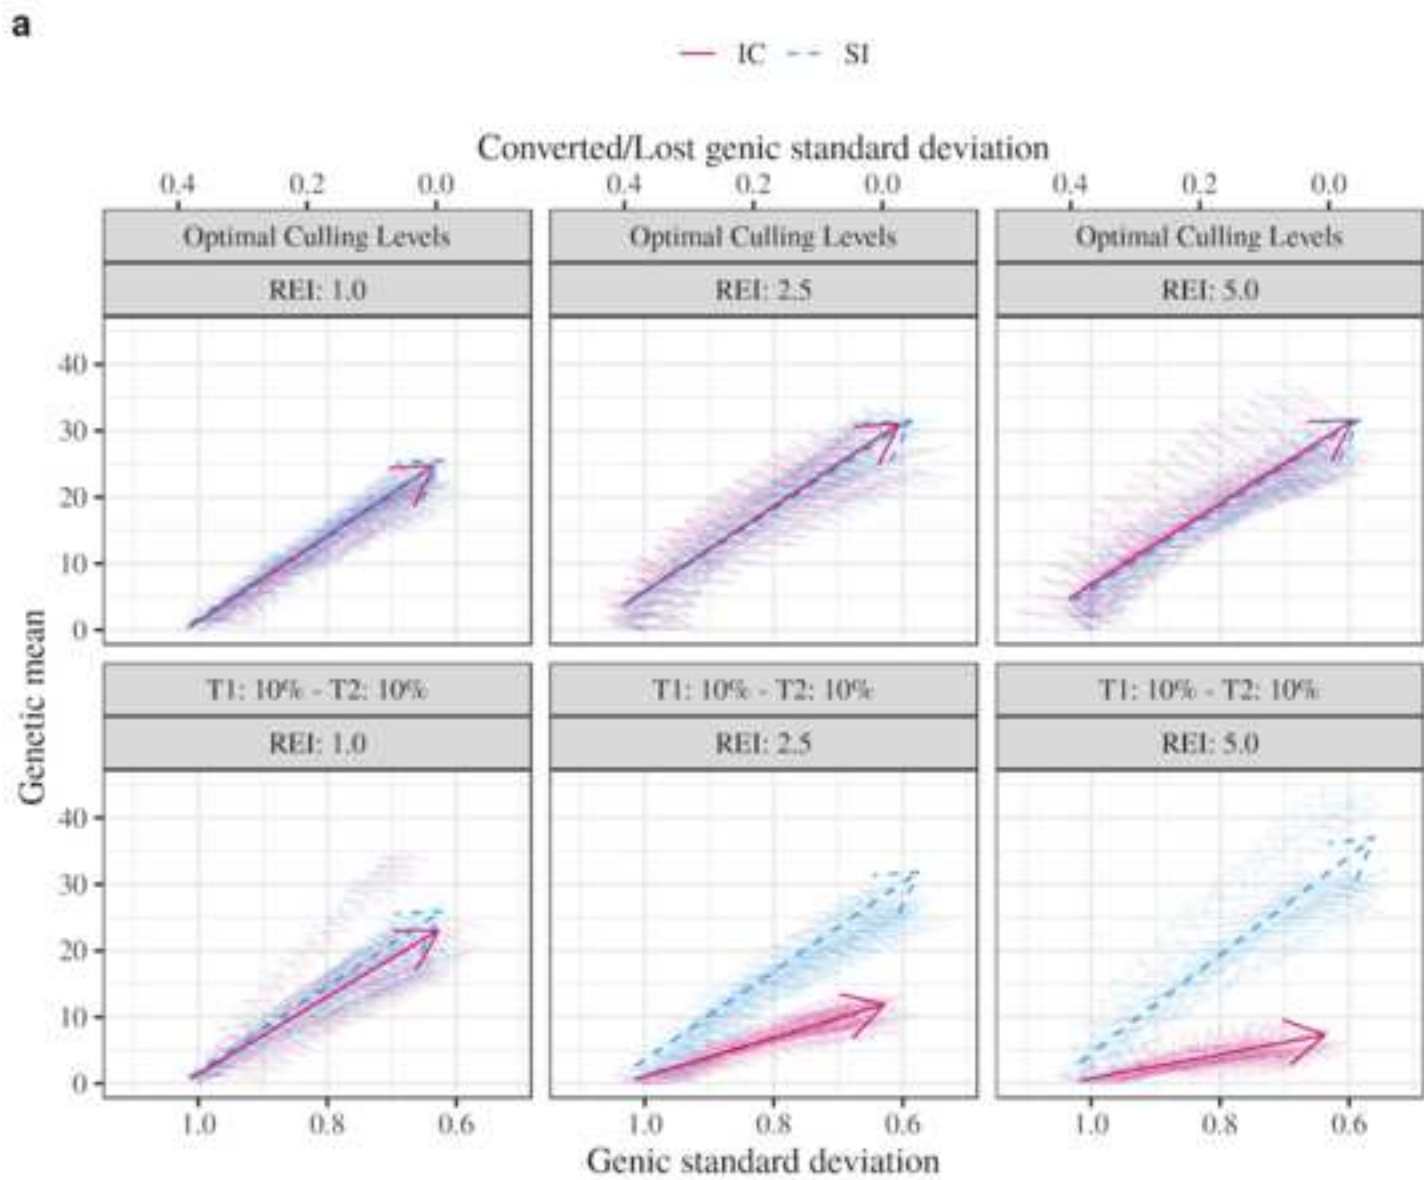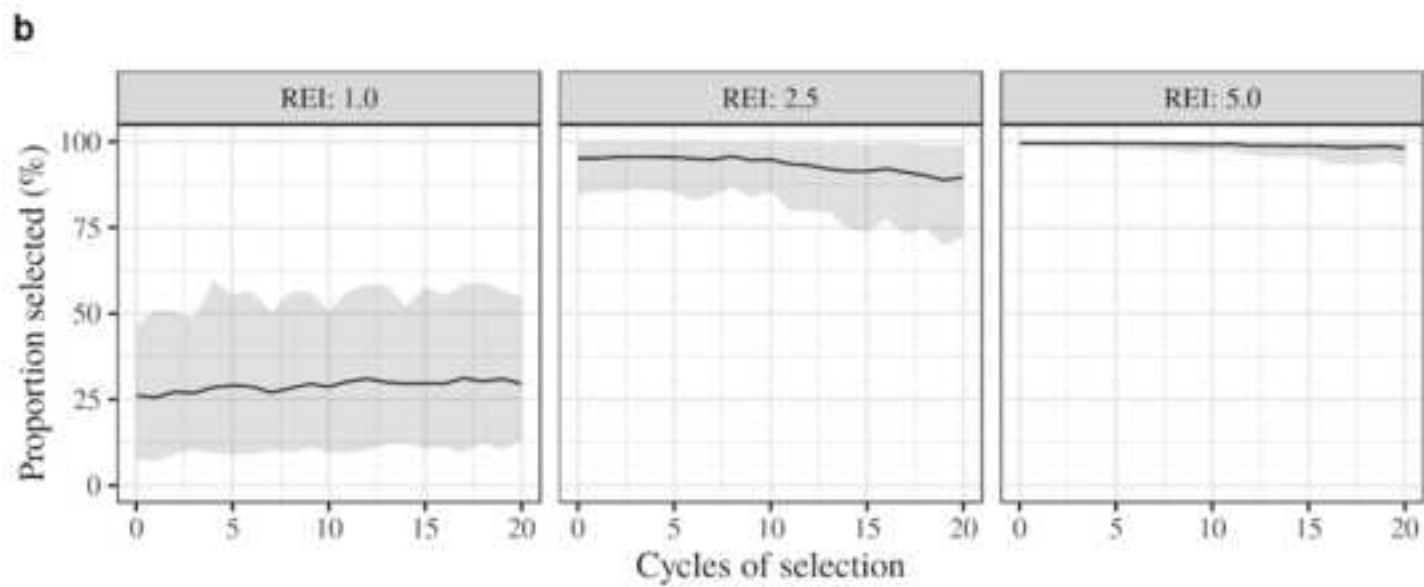

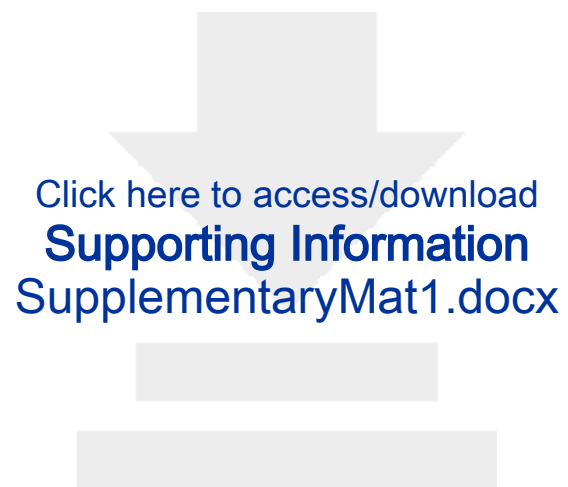

Supplement: pone.0235554.s003.pdf [file pone.0235554.s003.pdf]
